# Supplementary material for: Mobile App Usage Patterns of Patients Prescribed a Smoking Cessation Medicine: Prospective Observational Study
Source: PubMed Central journal article supplement (PMC5930175; doi:10.2196/mhealth.9115), 2018-04-17
Supplement: mhealth_v6i4e97_app1.pdf [file mhealth_v6i4e97_app1.pdf]

Multimedia Appendix 1 –frequently visited Pfizermeds App Screenshots

| Type of Material Accessed                         | Description of Material                                                                                                                                                                                                                       | Content of Page                                                                     |
|---------------------------------------------------|-----------------------------------------------------------------------------------------------------------------------------------------------------------------------------------------------------------------------------------------------|-------------------------------------------------------------------------------------|
| <p>Welcome Screen to Enter Unique Unlock Code</p> | <p>The welcome screen allowed the participant to enter a unique unlock code from participant letter. Only valid unlock codes allowed the participant to proceed to accept requirements for study participation and the app functionality.</p> | 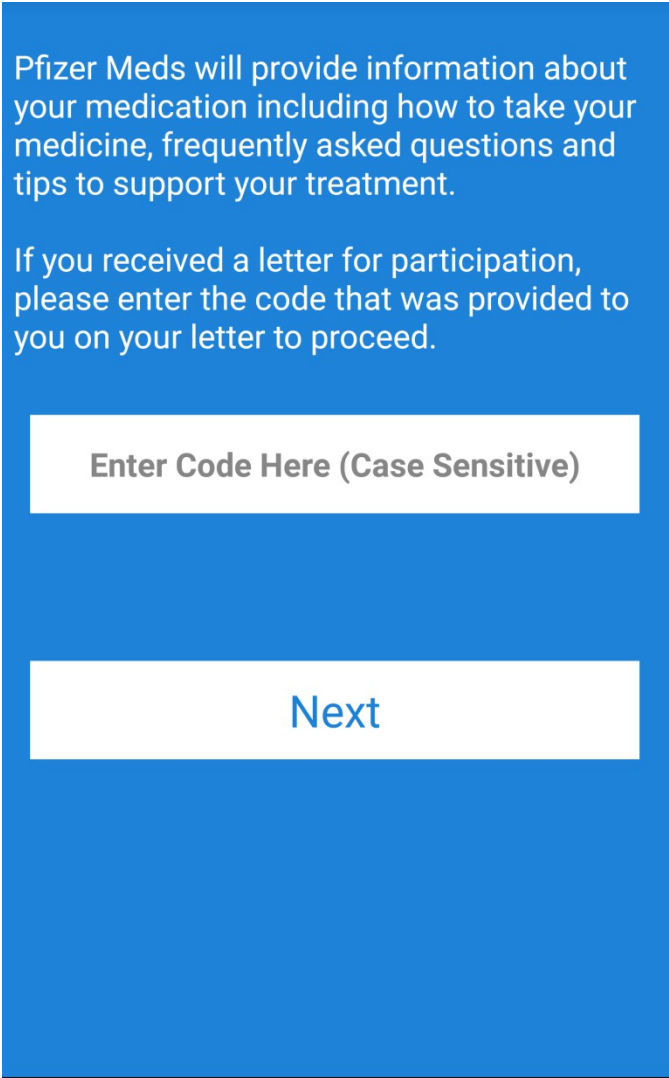 |

| Type of Material Accessed | Description of Material                                                                                                                                                                                                                                                                                                                                                                                                                                                                                                                                                                                                                                                       | Content of Page                                                                     |
|---------------------------|-------------------------------------------------------------------------------------------------------------------------------------------------------------------------------------------------------------------------------------------------------------------------------------------------------------------------------------------------------------------------------------------------------------------------------------------------------------------------------------------------------------------------------------------------------------------------------------------------------------------------------------------------------------------------------|-------------------------------------------------------------------------------------|
| App Settings              | <p>The following settings could be updated to customize and set preferences for the app. The settings screen could be accessed after initial setup for the participant to change values at a later time.</p> <ul style="list-style-type: none"> <li>• Remind Me – Set reminders for dosage frequency.</li> <li>• Quit Date – The day the participant planned to stop smoking completely.</li> <li>• Refill Reminder – Reminded the participant when to refill.</li> <li>• Motivational Messages – Display motivational notifications during the participant's treatment.</li> <li>• Tips to Handle Smoking Urges – Displayed weekly notifications to help overcome</li> </ul> | 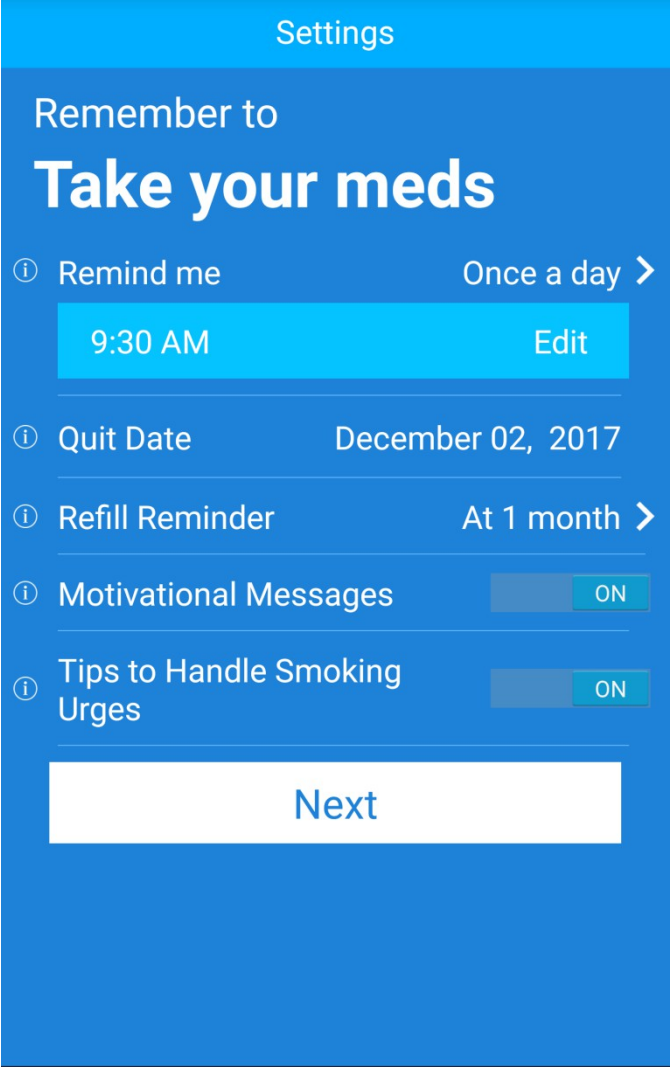 |

Multimedia Appendix 1 –frequently visited Pfizermeds App Screenshots

| Type of Material Accessed | Description of Material                                                                                                                                                                                                                                                                                                                                                  | Content of Page                                                                    |
|---------------------------|--------------------------------------------------------------------------------------------------------------------------------------------------------------------------------------------------------------------------------------------------------------------------------------------------------------------------------------------------------------------------|------------------------------------------------------------------------------------|
| Reminders Display         | <p>urges.</p> <p>If reminders were set, this screen was displayed under Reminders. The participant could scroll through past and future reminders and see when medication was taken. Medications marked as taken through reminders were automatically checked. The participant could also manually check or uncheck the item to indicate medication taken/not taken.</p> | 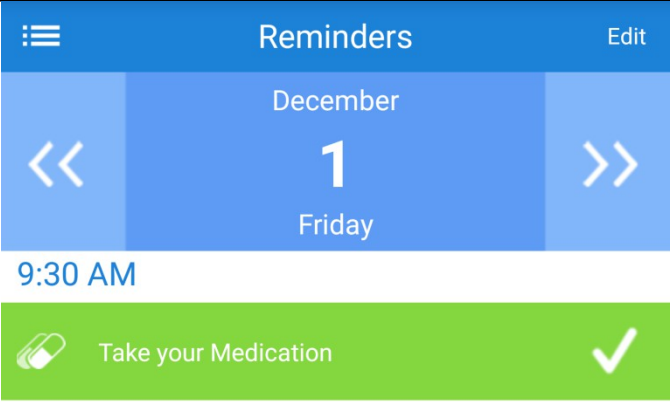 |

Multimedia Appendix 1 –frequently visited Pfizermeds App Screenshots

| Type of Material Accessed | Description of Material                                                                                                                                             | Content of Page                                                                     |
|---------------------------|---------------------------------------------------------------------------------------------------------------------------------------------------------------------|-------------------------------------------------------------------------------------|
| My Information Vault      | List of resource categories were displayed under My Information Vault. The participant could view helpful resources by selecting a category or conducting a search. | 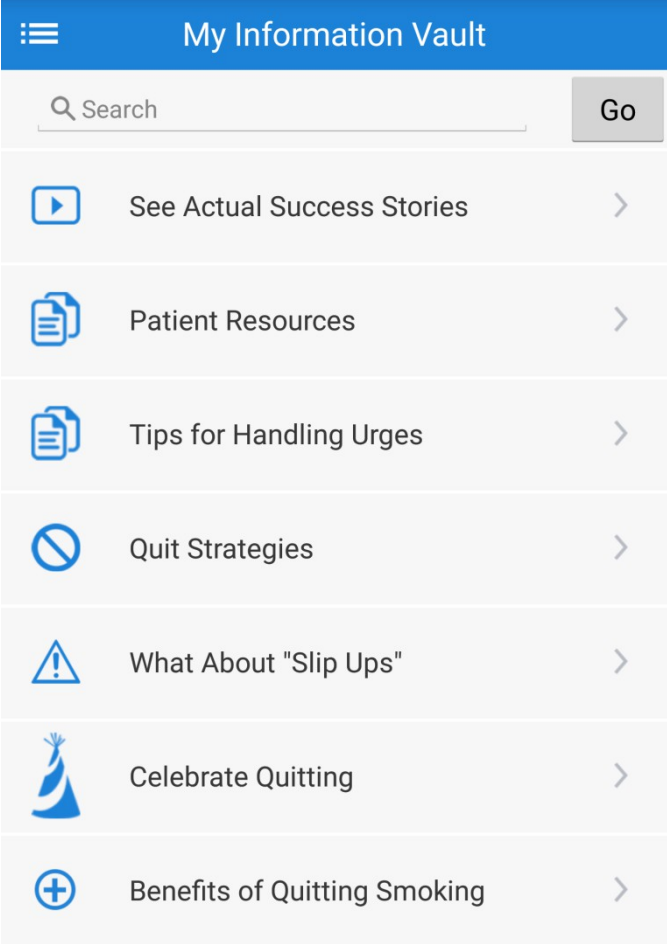 |

Multimedia Appendix 1 –frequently visited Pfizermeds App Screenshots

| Type of Material Accessed | Description of Material                                                    | Content of Page                                                                                                                                                                                                                                                                                                                                                                                                                                                                                                                                                                                                                                                                                                                                        |
|---------------------------|----------------------------------------------------------------------------|--------------------------------------------------------------------------------------------------------------------------------------------------------------------------------------------------------------------------------------------------------------------------------------------------------------------------------------------------------------------------------------------------------------------------------------------------------------------------------------------------------------------------------------------------------------------------------------------------------------------------------------------------------------------------------------------------------------------------------------------------------|
| Badge Awarded             | A badge was displayed when specific milestones were completed by the user. | 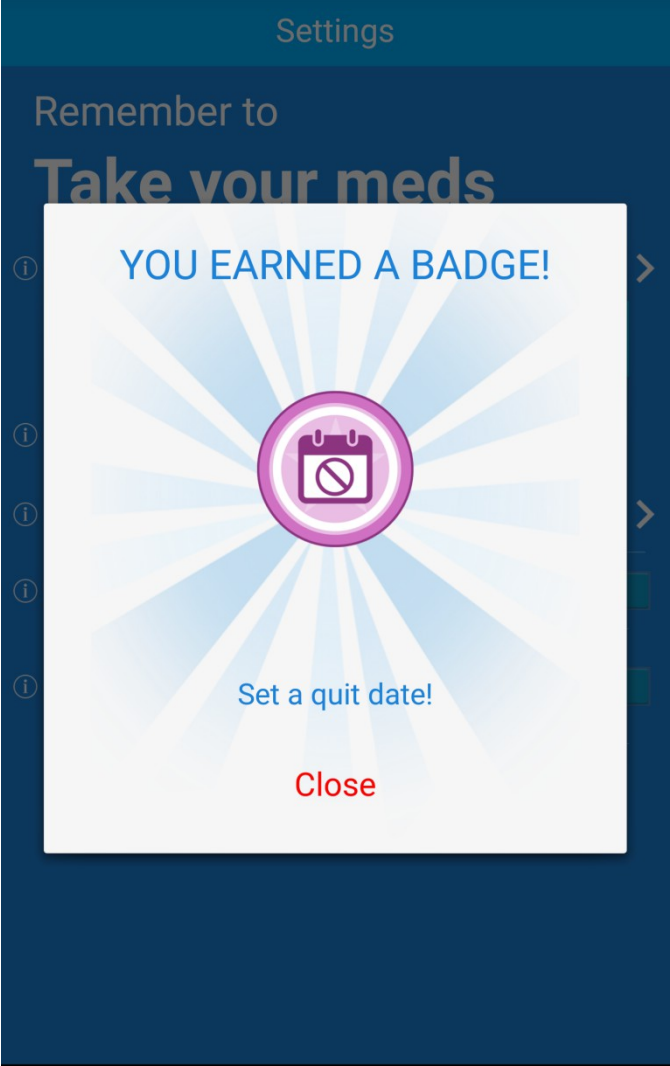 <p>The screenshot shows a mobile application interface. At the top, there is a dark blue header with the word "Settings" in white. Below the header, the text "Remember to" is in a smaller font, and "Take your meds" is in a large, bold, white font. A white notification box with a blue border is centered on the screen. The notification box contains the text "YOU EARNED A BADGE!" in blue, a purple circular icon with a white calendar icon inside, and the text "Set a quit date!" in blue. At the bottom of the notification box, the word "Close" is written in red. The background of the app is dark blue with a subtle pattern of white dots.</p> |
